# Supplementary material
Source: publisher figshare collection journal article supplement (https://springernature.figshare.com/ndownloader/files/7082252)
Supplement: Supplementary file [file 7082252]

**Direct measurement of Bisphenol A (BPA), BPA glucuronide and BPA sulfate in a diverse and low-income population of pregnant women reveals high exposure, with potential implications for previous exposure estimates: a cross-sectional study.**

Roy R. Gerona, Janet Pan, Ami R. Zota, Jackie M. Schwartz, Matthew Friesen, Julia A. Taylor, Patricia A. Hunt, Tracey J. Woodruff

**Additional File 2**

Urinary BPA analyte concentrations by log-transformed, creatinine-adjusted levels of Total BPA in Second Trimester Pregnant Women, Northern and Central California, 2009-2011 (n=112)

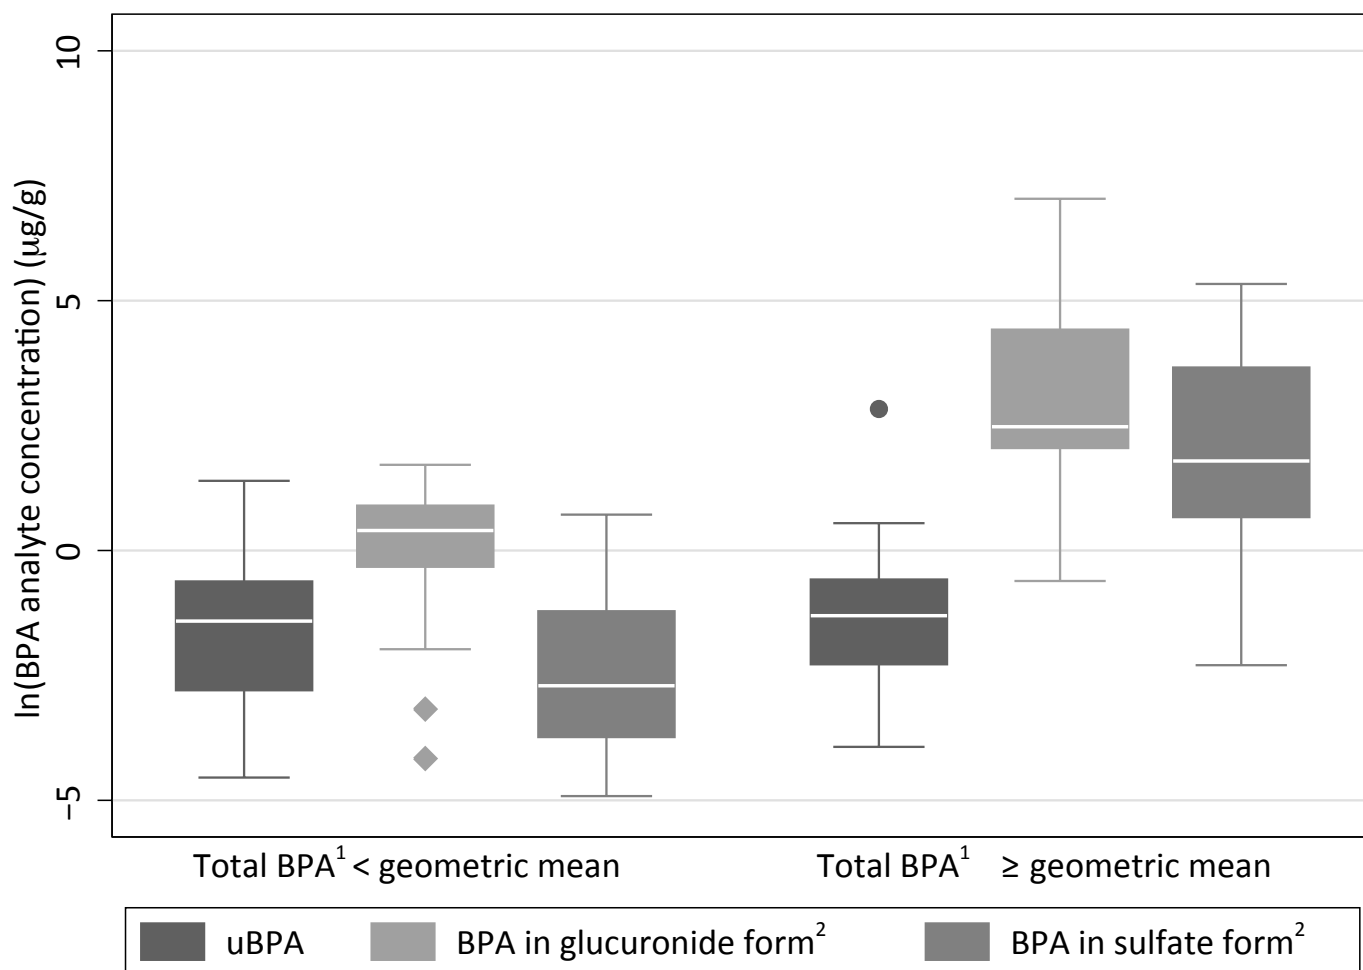

1. BPA in glucuronide form=BPA glucuronide\*0.5614. BPA in sulfate form=BPA sulfate\*0.7404. The factors 0.5614 and 0.7404 are the ratios of the molecular weight of BPA to the molecular weights of BPA glucuronide and BPA sulfate, respectively.

2. BPA analyte concentrations log-transformed and creatinine-adjusted
